# Supplementary material
Source: publisher figshare collection journal article supplement (https://acs.figshare.com/ndownloader/files/4104811)
Supplement: Supplementary file 1 [file 4104811]

 
data_c:\data\stufff~1\fromda~1\lu11b\refine\mono 
 
_audit_creation_method            SHELXL-97 
_chemical_name_systematic 
; 
'Pr4NTCNQF4' 
; 
_chemical_name_common             'Pr4NTCNQF4'  
_chemical_melting_point           ? 
_chemical_formula_moiety          'C24 H28 F4 N5' 
_chemical_formula_sum 
 'C24 H28 F4 N5' 
_chemical_formula_weight          462.51 
 
loop_ 
 _atom_type_symbol 
 _atom_type_description       
 _atom_type_scat_dispersion_real 
 _atom_type_scat_dispersion_imag 
 _atom_type_scat_source 
 'C'  'C'   0.0033   0.0016 
 'International Tables Vol C Tables 4.2.6.8 and 6.1.1.4' 
 'H'  'H'   0.0000   0.0000 
 'International Tables Vol C Tables 4.2.6.8 and 6.1.1.4' 
 'N'  'N'   0.0061   0.0033 
 'International Tables Vol C Tables 4.2.6.8 and 6.1.1.4' 
 'F'  'F'   0.0171   0.0103 
 'International Tables Vol C Tables 4.2.6.8 and 6.1.1.4' 
 
_symmetry_cell_setting            monoclinic
_symmetry_space_group_name_H-M    'P2(1)/n'
 
loop_ 
 _symmetry_equiv_pos_as_xyz 
 'x, y, z' 
 '-x+1/2, y+1/2, -z+1/2' 
 '-x, -y, -z' 
 'x-1/2, -y-1/2, z-1/2' 
 
_cell_length_a                    14.946(3) 
_cell_length_b                    7.1680(14) 
_cell_length_c                    22.136(4) 
_cell_angle_alpha                 90.00 
_cell_angle_beta                  103.01(3) 
_cell_angle_gamma                 90.00 
_cell_volume                      2310.6(8) 
_cell_formula_units_Z             4 
_cell_measurement_temperature     123(2) 
_cell_measurement_reflns_used     ? 
_cell_measurement_theta_min       3.17 
_cell_measurement_theta_max       25.00 
 
_exptl_crystal_description        needle 
_exptl_crystal_colour             blue 
_exptl_crystal_size_max           0.09 
_exptl_crystal_size_mid           0.03 
_exptl_crystal_size_min           0.01 
_exptl_crystal_density_meas       ? 
_exptl_crystal_density_diffrn     1.330 
_exptl_crystal_density_method     'not measured' 
_exptl_crystal_F_000              972 
_exptl_absorpt_coefficient_mu     0.103 
_exptl_absorpt_correction_type    'Empirical'   
_exptl_absorpt_correction_T_min   0.9908 
_exptl_absorpt_correction_T_max   0.9990 
_exptl_absorpt_process_details    'XDS'   
 
_exptl_special_details 
; 
 ? 
; 
 
_diffrn_ambient_temperature       123(2) 
_diffrn_radiation_wavelength      0.77343 
_diffrn_radiation_type            Synchrotron
_diffrn_radiation_source          'fine-focus sealed tube' 
_diffrn_radiation_monochromator   ?
_diffrn_measurement_device_type   'ADSC Quantum 210r Detector'  
_diffrn_measurement_method        'phi scan' 
 
_diffrn_detector_area_resol_mean  ? 
_diffrn_standards_number          ? 
_diffrn_standards_interval_count  ? 
_diffrn_standards_interval_time   ? 
_diffrn_standards_decay_%         ? 
_diffrn_reflns_number             14654 
_diffrn_reflns_av_R_equivalents   0.0478 
_diffrn_reflns_av_sigmaI/netI     0.0372 
_diffrn_reflns_limit_h_min        -16 
_diffrn_reflns_limit_h_max        16 
_diffrn_reflns_limit_k_min        -7 
_diffrn_reflns_limit_k_max        7 
_diffrn_reflns_limit_l_min        -24 
_diffrn_reflns_limit_l_max        24 
_diffrn_reflns_theta_min          3.17 
_diffrn_reflns_theta_max          24.99 
_reflns_number_total              3145 
_reflns_number_gt                 3582 
_reflns_threshold_expression      >2sigma(I) 
 
_computing_data_collection        'Blu-Ice'   
_computing_cell_refinement        'XDS (Kabsch, 1993)'   
_computing_data_reduction         'XDS (Kabsch, 1993)'  
_computing_structure_solution     'SHELXS-97 (Sheldrick, 1990)' 
_computing_structure_refinement   'SHELXL-97 (Sheldrick, 1997)' 
_computing_molecular_graphics     'X-Seed (Barbour)'  
_computing_publication_material   'CIFTAB'   
 
_refine_special_details 
; 
 Refinement of F^2^ against ALL reflections.  The weighted R-factor wR and 
 goodness of fit S are based on F^2^, conventional R-factors R are based 
 on F, with F set to zero for negative F^2^. The threshold expression of 
 F^2^ > 2sigma(F^2^) is used only for calculating R-factors(gt) etc. and is 
 not relevant to the choice of reflections for refinement.  R-factors based 
 on F^2^ are statistically about twice as large as those based on F, and R- 
 factors based on ALL data will be even larger. 
; 
 
_refine_ls_structure_factor_coef  Fsqd  
_refine_ls_matrix_type            full 
_refine_ls_weighting_scheme       calc  
_refine_ls_weighting_details 
 'calc w=1/[\s^2^(Fo^2^)+(0.0598P)^2^+1.2372P] where P=(Fo^2^+2Fc^2^)/3' 
_atom_sites_solution_primary      direct 
_atom_sites_solution_secondary    difmap 
_atom_sites_solution_hydrogens    geom 
_refine_ls_hydrogen_treatment     constr  
_refine_ls_extinction_method      none 
_refine_ls_extinction_coef        ? 
_refine_ls_number_reflns          4046 
_refine_ls_number_parameters      302 
_refine_ls_number_restraints      0 
_refine_ls_R_factor_all           0.0482 
_refine_ls_R_factor_gt            0.0426 
_refine_ls_wR_factor_ref          0.1126 
_refine_ls_wR_factor_gt           0.1087 
_refine_ls_goodness_of_fit_ref    1.048 
_refine_ls_restrained_S_all       1.048 
_refine_ls_shift/su_max           0.001 
_refine_ls_shift/su_mean          0.000 
 
loop_ 
 _atom_site_label 
 _atom_site_type_symbol 
 _atom_site_fract_x 
 _atom_site_fract_y 
 _atom_site_fract_z 
 _atom_site_U_iso_or_equiv 
 _atom_site_adp_type 
 _atom_site_occupancy 
 _atom_site_symmetry_multiplicity 
 _atom_site_calc_flag 
 _atom_site_refinement_flags 
 _atom_site_disorder_assembly 
 _atom_site_disorder_group 
F1 F 0.72183(6) 0.62753(13) 0.07371(4) 0.0153(2) Uani 1 1 d . . . 
F2 F 0.62308(6) 0.54380(13) 0.15272(4) 0.0163(2) Uani 1 1 d . . . 
F3 F 0.35454(6) 0.73823(13) 0.00822(4) 0.0171(2) Uani 1 1 d . . . 
F4 F 0.45308(6) 0.82454(13) -0.07084(4) 0.0170(2) Uani 1 1 d . . . 
C7 C 0.46453(10) 0.5041(2) 0.18635(7) 0.0128(3) Uani 1 1 d . . . 
C8 C 0.33358(11) 0.6356(2) 0.11858(7) 0.0157(3) Uani 1 1 d . . . 
C5 C 0.48264(10) 0.63591(19) 0.08545(6) 0.0090(3) Uani 1 1 d . . . 
C1 C 0.63055(10) 0.65626(19) 0.05627(7) 0.0094(3) Uani 1 1 d . . . 
C3 C 0.44603(10) 0.7126(2) 0.02586(7) 0.0102(3) Uani 1 1 d . . . 
C2 C 0.57921(10) 0.61223(19) 0.09742(6) 0.0091(3) Uani 1 1 d . . . 
N1 N 0.98235(8) 0.42613(16) 0.15984(5) 0.0092(3) Uani 1 1 d . . . 
C9 C 0.59391(10) 0.73060(19) -0.00383(6) 0.0093(3) Uani 1 1 d . . . 
C11 C 0.74238(11) 0.7286(2) -0.03709(7) 0.0160(3) Uani 1 1 d . . . 
C4 C 0.49742(10) 0.75737(19) -0.01512(6) 0.0096(3) Uani 1 1 d . . . 
N4 N 0.81935(10) 0.6946(2) -0.03095(6) 0.0257(4) Uani 1 1 d . . . 
N3 N 0.25777(10) 0.6712(2) 0.11547(7) 0.0276(4) Uani 1 1 d . . . 
C22 C 0.92140(10) 0.5336(2) 0.19416(7) 0.0127(3) Uani 1 1 d . . . 
H22A H 0.8656 0.5736 0.1637 0.015 Uiso 1 1 calc R . . 
H22B H 0.9545 0.6477 0.2118 0.015 Uiso 1 1 calc R . . 
N5 N 0.58712(10) 0.9515(2) -0.14923(6) 0.0224(3) Uani 1 1 d . . . 
C16 C 0.99298(10) 0.5372(2) 0.10324(6) 0.0130(3) Uani 1 1 d . . . 
H16A H 1.0294 0.4618 0.0800 0.016 Uiso 1 1 calc R . . 
H16B H 0.9313 0.5551 0.0760 0.016 Uiso 1 1 calc R . . 
C12 C 0.61173(11) 0.8699(2) -0.10376(7) 0.0147(3) Uani 1 1 d . . . 
C10 C 0.64698(10) 0.7707(2) -0.04744(7) 0.0113(3) Uani 1 1 d . . . 
C13 C 1.07510(10) 0.3957(2) 0.20427(6) 0.0108(3) Uani 1 1 d . . . 
H13A H 1.1024 0.5192 0.2173 0.013 Uiso 1 1 calc R . . 
H13B H 1.0646 0.3322 0.2418 0.013 Uiso 1 1 calc R . . 
C6 C 0.42817(10) 0.5866(2) 0.12733(7) 0.0105(3) Uani 1 1 d . . . 
N2 N 0.48903(10) 0.43925(19) 0.23482(6) 0.0201(3) Uani 1 1 d . . . 
C15 C 1.23886(11) 0.2998(3) 0.22209(8) 0.0227(4) Uani 1 1 d . . . 
H15A H 1.2602 0.4291 0.2222 0.034 Uiso 1 1 calc R . . 
H15B H 1.2821 0.2175 0.2076 0.034 Uiso 1 1 calc R . . 
H15C H 1.2352 0.2638 0.2642 0.034 Uiso 1 1 calc R . . 
C19 C 0.94115(10) 0.2373(2) 0.13823(7) 0.0120(3) Uani 1 1 d . . . 
H19A H 0.9454 0.1569 0.1751 0.014 Uiso 1 1 calc R . . 
H19B H 0.9793 0.1792 0.1121 0.014 Uiso 1 1 calc R . . 
C17 C 1.03839(10) 0.7271(2) 0.11647(7) 0.0145(3) Uani 1 1 d . . . 
H17A H 1.0995 0.7134 0.1449 0.017 Uiso 1 1 calc R . . 
H17B H 1.0003 0.8091 0.1365 0.017 Uiso 1 1 calc R . . 
C20 C 0.84172(11) 0.2376(2) 0.10175(7) 0.0165(3) Uani 1 1 d . . . 
H20A H 0.8022 0.3000 0.1260 0.020 Uiso 1 1 calc R . . 
H20B H 0.8365 0.3064 0.0623 0.020 Uiso 1 1 calc R . . 
C18 C 1.04869(11) 0.8131(2) 0.05529(8) 0.0217(4) Uani 1 1 d . . . 
H18A H 1.0869 0.7318 0.0359 0.033 Uiso 1 1 calc R . . 
H18C H 1.0778 0.9359 0.0632 0.033 Uiso 1 1 calc R . . 
H18B H 0.9880 0.8268 0.0275 0.033 Uiso 1 1 calc R . . 
C14 C 1.14428(11) 0.2826(3) 0.17892(7) 0.0200(4) Uani 1 1 d . . . 
H14A H 1.1466 0.3287 0.1371 0.024 Uiso 1 1 calc R . . 
H14B H 1.1253 0.1500 0.1752 0.024 Uiso 1 1 calc R . . 
C23 C 0.89160(11) 0.4290(2) 0.24615(7) 0.0178(3) Uani 1 1 d . . . 
H23A H 0.9463 0.3893 0.2777 0.021 Uiso 1 1 calc R . . 
H23B H 0.8565 0.3162 0.2294 0.021 Uiso 1 1 calc R . . 
C21 C 0.81113(11) 0.0364(2) 0.08855(8) 0.0230(4) Uani 1 1 d . . . 
H21A H 0.8475 -0.0215 0.0619 0.035 Uiso 1 1 calc R . . 
H21B H 0.7460 0.0337 0.0676 0.035 Uiso 1 1 calc R . . 
H21C H 0.8202 -0.0327 0.1277 0.035 Uiso 1 1 calc R . . 
C24 C 0.83198(13) 0.5565(3) 0.27574(9) 0.0299(4) Uani 1 1 d . . . 
H24A H 0.8673 0.6671 0.2928 0.045 Uiso 1 1 calc R . . 
H24B H 0.8124 0.4894 0.3091 0.045 Uiso 1 1 calc R . . 
H24C H 0.7778 0.5948 0.2443 0.045 Uiso 1 1 calc R . . 
 
loop_ 
 _atom_site_aniso_label 
 _atom_site_aniso_U_11 
 _atom_site_aniso_U_22 
 _atom_site_aniso_U_33 
 _atom_site_aniso_U_23 
 _atom_site_aniso_U_13 
 _atom_site_aniso_U_12 
F1 0.0059(4) 0.0226(5) 0.0162(4) 0.0025(4) -0.0003(3) 0.0010(4) 
F2 0.0136(4) 0.0249(5) 0.0080(4) 0.0069(4) -0.0026(3) 0.0021(4) 
F3 0.0071(4) 0.0267(5) 0.0165(5) 0.0049(4) 0.0007(4) 0.0057(4) 
F4 0.0157(5) 0.0243(5) 0.0086(4) 0.0085(4) -0.0021(3) 0.0033(4) 
C7 0.0178(8) 0.0099(7) 0.0123(8) -0.0035(6) 0.0065(6) -0.0014(6) 
C8 0.0197(9) 0.0167(8) 0.0124(7) -0.0023(6) 0.0073(6) -0.0009(6) 
C5 0.0128(7) 0.0057(6) 0.0081(7) -0.0029(5) 0.0012(6) 0.0004(5) 
C1 0.0062(7) 0.0087(7) 0.0118(7) -0.0025(5) -0.0011(5) 0.0009(5) 
C3 0.0072(7) 0.0098(7) 0.0124(7) -0.0012(6) 0.0002(6) 0.0018(5) 
C2 0.0119(7) 0.0087(7) 0.0045(6) 0.0003(5) -0.0028(5) 0.0012(5) 
N1 0.0120(6) 0.0075(6) 0.0071(6) 0.0002(5) 0.0000(5) 0.0004(5) 
C9 0.0117(7) 0.0067(7) 0.0090(7) -0.0032(5) 0.0012(6) -0.0022(5) 
C11 0.0173(9) 0.0227(8) 0.0091(7) -0.0058(6) 0.0050(6) -0.0072(7) 
C4 0.0121(7) 0.0090(7) 0.0055(7) 0.0009(5) -0.0025(6) 0.0025(5) 
N4 0.0153(8) 0.0474(10) 0.0157(7) -0.0068(7) 0.0061(6) -0.0044(7) 
N3 0.0175(8) 0.0407(9) 0.0272(8) -0.0006(7) 0.0107(6) 0.0035(7) 
C22 0.0134(7) 0.0106(7) 0.0140(7) -0.0042(6) 0.0030(6) 0.0012(6) 
N5 0.0328(8) 0.0189(7) 0.0176(7) 0.0049(6) 0.0099(6) 0.0011(6) 
C16 0.0186(8) 0.0127(7) 0.0069(7) 0.0030(6) 0.0011(6) 0.0008(6) 
C12 0.0203(8) 0.0113(7) 0.0146(8) -0.0026(6) 0.0086(6) -0.0039(6) 
C10 0.0133(7) 0.0103(7) 0.0104(7) -0.0022(6) 0.0027(6) -0.0025(6) 
C13 0.0101(7) 0.0130(7) 0.0076(7) 0.0017(5) -0.0017(6) 0.0008(6) 
C6 0.0129(7) 0.0093(7) 0.0094(7) -0.0019(5) 0.0024(6) 0.0010(6) 
N2 0.0306(8) 0.0174(7) 0.0127(7) 0.0011(6) 0.0059(6) 0.0013(6) 
C15 0.0135(8) 0.0300(9) 0.0239(9) 0.0068(7) 0.0027(7) 0.0043(7) 
C19 0.0165(8) 0.0071(7) 0.0106(7) -0.0022(5) -0.0007(6) 0.0003(6) 
C17 0.0135(7) 0.0145(7) 0.0163(8) 0.0024(6) 0.0051(6) -0.0007(6) 
C20 0.0172(8) 0.0113(7) 0.0172(8) -0.0020(6) -0.0044(6) 0.0012(6) 
C18 0.0196(8) 0.0232(9) 0.0213(8) 0.0107(7) 0.0022(7) -0.0010(7) 
C14 0.0161(8) 0.0312(9) 0.0129(8) -0.0011(7) 0.0038(6) 0.0065(7) 
C23 0.0151(8) 0.0228(8) 0.0172(8) -0.0014(6) 0.0070(6) -0.0009(6) 
C21 0.0175(8) 0.0151(8) 0.0318(9) -0.0064(7) -0.0044(7) -0.0016(7) 
C24 0.0244(9) 0.0408(11) 0.0279(10) -0.0091(8) 0.0130(8) 0.0006(8) 
 
_geom_special_details 
; 
 All esds (except the esd in the dihedral angle between two l.s. planes) 
 are estimated using the full covariance matrix.  The cell esds are taken 
 into account individually in the estimation of esds in distances, angles 
 and torsion angles; correlations between esds in cell parameters are only 
 used when they are defined by crystal symmetry.  An approximate (isotropic) 
 treatment of cell esds is used for estimating esds involving l.s. planes. 
; 
 
loop_ 
 _geom_bond_atom_site_label_1 
 _geom_bond_atom_site_label_2 
 _geom_bond_distance 
 _geom_bond_site_symmetry_2 
 _geom_bond_publ_flag 
F1 C1 1.3475(17) . ? 
F2 C2 1.3445(16) . ? 
F3 C3 1.3476(17) . ? 
F4 C4 1.3507(17) . ? 
C7 N2 1.151(2) . ? 
C7 C6 1.426(2) . ? 
C8 N3 1.148(2) . ? 
C8 C6 1.427(2) . ? 
C5 C6 1.410(2) . ? 
C5 C2 1.418(2) . ? 
C5 C3 1.420(2) . ? 
C1 C2 1.354(2) . ? 
C1 C9 1.423(2) . ? 
C3 C4 1.353(2) . ? 
N1 C19 1.5192(18) . ? 
N1 C22 1.5203(18) . ? 
N1 C16 1.5227(18) . ? 
N1 C13 1.5240(18) . ? 
C9 C10 1.410(2) . ? 
C9 C4 1.420(2) . ? 
C11 N4 1.154(2) . ? 
C11 C10 1.425(2) . ? 
C22 C23 1.522(2) . ? 
C22 H22A 0.9900 . ? 
C22 H22B 0.9900 . ? 
N5 C12 1.151(2) . ? 
C16 C17 1.520(2) . ? 
C16 H16A 0.9900 . ? 
C16 H16B 0.9900 . ? 
C12 C10 1.429(2) . ? 
C13 C14 1.517(2) . ? 
C13 H13A 0.9900 . ? 
C13 H13B 0.9900 . ? 
C15 C14 1.523(2) . ? 
C15 H15A 0.9800 . ? 
C15 H15B 0.9800 . ? 
C15 H15C 0.9800 . ? 
C19 C20 1.523(2) . ? 
C19 H19A 0.9900 . ? 
C19 H19B 0.9900 . ? 
C17 C18 1.527(2) . ? 
C17 H17A 0.9900 . ? 
C17 H17B 0.9900 . ? 
C20 C21 1.521(2) . ? 
C20 H20A 0.9900 . ? 
C20 H20B 0.9900 . ? 
C18 H18A 0.9800 . ? 
C18 H18C 0.9800 . ? 
C18 H18B 0.9800 . ? 
C14 H14A 0.9900 . ? 
C14 H14B 0.9900 . ? 
C23 C24 1.523(2) . ? 
C23 H23A 0.9900 . ? 
C23 H23B 0.9900 . ? 
C21 H21A 0.9800 . ? 
C21 H21B 0.9800 . ? 
C21 H21C 0.9800 . ? 
C24 H24A 0.9800 . ? 
C24 H24B 0.9800 . ? 
C24 H24C 0.9800 . ? 
 
loop_ 
 _geom_angle_atom_site_label_1 
 _geom_angle_atom_site_label_2 
 _geom_angle_atom_site_label_3 
 _geom_angle 
 _geom_angle_site_symmetry_1 
 _geom_angle_site_symmetry_3 
 _geom_angle_publ_flag 
N2 C7 C6 176.03(16) . . ? 
N3 C8 C6 175.49(16) . . ? 
C6 C5 C2 124.16(13) . . ? 
C6 C5 C3 123.31(13) . . ? 
C2 C5 C3 112.53(13) . . ? 
F1 C1 C2 117.53(13) . . ? 
F1 C1 C9 118.47(13) . . ? 
C2 C1 C9 124.00(13) . . ? 
F3 C3 C4 117.76(13) . . ? 
F3 C3 C5 118.40(13) . . ? 
C4 C3 C5 123.82(13) . . ? 
F2 C2 C1 117.62(13) . . ? 
F2 C2 C5 118.76(13) . . ? 
C1 C2 C5 123.62(13) . . ? 
C19 N1 C22 111.26(11) . . ? 
C19 N1 C16 108.46(11) . . ? 
C22 N1 C16 109.37(11) . . ? 
C19 N1 C13 108.72(11) . . ? 
C22 N1 C13 108.09(11) . . ? 
C16 N1 C13 110.96(11) . . ? 
C10 C9 C4 123.87(14) . . ? 
C10 C9 C1 123.99(13) . . ? 
C4 C9 C1 112.14(13) . . ? 
N4 C11 C10 177.57(16) . . ? 
F4 C4 C3 117.45(13) . . ? 
F4 C4 C9 118.62(13) . . ? 
C3 C4 C9 123.87(13) . . ? 
N1 C22 C23 116.03(12) . . ? 
N1 C22 H22A 108.3 . . ? 
C23 C22 H22A 108.3 . . ? 
N1 C22 H22B 108.3 . . ? 
C23 C22 H22B 108.3 . . ? 
H22A C22 H22B 107.4 . . ? 
C17 C16 N1 115.75(12) . . ? 
C17 C16 H16A 108.3 . . ? 
N1 C16 H16A 108.3 . . ? 
C17 C16 H16B 108.3 . . ? 
N1 C16 H16B 108.3 . . ? 
H16A C16 H16B 107.4 . . ? 
N5 C12 C10 177.08(17) . . ? 
C9 C10 C11 122.92(14) . . ? 
C9 C10 C12 123.03(14) . . ? 
C11 C10 C12 113.88(13) . . ? 
C14 C13 N1 115.76(12) . . ? 
C14 C13 H13A 108.3 . . ? 
N1 C13 H13A 108.3 . . ? 
C14 C13 H13B 108.3 . . ? 
N1 C13 H13B 108.3 . . ? 
H13A C13 H13B 107.4 . . ? 
C5 C6 C7 123.32(13) . . ? 
C5 C6 C8 123.38(13) . . ? 
C7 C6 C8 112.84(13) . . ? 
C14 C15 H15A 109.5 . . ? 
C14 C15 H15B 109.5 . . ? 
H15A C15 H15B 109.5 . . ? 
C14 C15 H15C 109.5 . . ? 
H15A C15 H15C 109.5 . . ? 
H15B C15 H15C 109.5 . . ? 
N1 C19 C20 116.33(12) . . ? 
N1 C19 H19A 108.2 . . ? 
C20 C19 H19A 108.2 . . ? 
N1 C19 H19B 108.2 . . ? 
C20 C19 H19B 108.2 . . ? 
H19A C19 H19B 107.4 . . ? 
C16 C17 C18 108.68(13) . . ? 
C16 C17 H17A 110.0 . . ? 
C18 C17 H17A 110.0 . . ? 
C16 C17 H17B 110.0 . . ? 
C18 C17 H17B 110.0 . . ? 
H17A C17 H17B 108.3 . . ? 
C21 C20 C19 108.39(12) . . ? 
C21 C20 H20A 110.0 . . ? 
C19 C20 H20A 110.0 . . ? 
C21 C20 H20B 110.0 . . ? 
C19 C20 H20B 110.0 . . ? 
H20A C20 H20B 108.4 . . ? 
C17 C18 H18A 109.5 . . ? 
C17 C18 H18C 109.5 . . ? 
H18A C18 H18C 109.5 . . ? 
C17 C18 H18B 109.5 . . ? 
H18A C18 H18B 109.5 . . ? 
H18C C18 H18B 109.5 . . ? 
C13 C14 C15 109.79(13) . . ? 
C13 C14 H14A 109.7 . . ? 
C15 C14 H14A 109.7 . . ? 
C13 C14 H14B 109.7 . . ? 
C15 C14 H14B 109.7 . . ? 
H14A C14 H14B 108.2 . . ? 
C22 C23 C24 109.22(14) . . ? 
C22 C23 H23A 109.8 . . ? 
C24 C23 H23A 109.8 . . ? 
C22 C23 H23B 109.8 . . ? 
C24 C23 H23B 109.8 . . ? 
H23A C23 H23B 108.3 . . ? 
C20 C21 H21A 109.5 . . ? 
C20 C21 H21B 109.5 . . ? 
H21A C21 H21B 109.5 . . ? 
C20 C21 H21C 109.5 . . ? 
H21A C21 H21C 109.5 . . ? 
H21B C21 H21C 109.5 . . ? 
C23 C24 H24A 109.5 . . ? 
C23 C24 H24B 109.5 . . ? 
H24A C24 H24B 109.5 . . ? 
C23 C24 H24C 109.5 . . ? 
H24A C24 H24C 109.5 . . ? 
H24B C24 H24C 109.5 . . ? 
 
loop_ 
 _geom_torsion_atom_site_label_1 
 _geom_torsion_atom_site_label_2 
 _geom_torsion_atom_site_label_3 
 _geom_torsion_atom_site_label_4 
 _geom_torsion 
 _geom_torsion_site_symmetry_1 
 _geom_torsion_site_symmetry_2 
 _geom_torsion_site_symmetry_3 
 _geom_torsion_site_symmetry_4 
 _geom_torsion_publ_flag 
C6 C5 C3 F3 -0.5(2) . . . . ? 
C2 C5 C3 F3 178.55(12) . . . . ? 
C6 C5 C3 C4 -178.78(14) . . . . ? 
C2 C5 C3 C4 0.3(2) . . . . ? 
F1 C1 C2 F2 0.25(19) . . . . ? 
C9 C1 C2 F2 -179.71(12) . . . . ? 
F1 C1 C2 C5 179.69(12) . . . . ? 
C9 C1 C2 C5 -0.3(2) . . . . ? 
C6 C5 C2 F2 -2.1(2) . . . . ? 
C3 C5 C2 F2 178.83(12) . . . . ? 
C6 C5 C2 C1 178.45(14) . . . . ? 
C3 C5 C2 C1 -0.6(2) . . . . ? 
F1 C1 C9 C10 2.2(2) . . . . ? 
C2 C1 C9 C10 -177.83(14) . . . . ? 
F1 C1 C9 C4 -178.60(12) . . . . ? 
C2 C1 C9 C4 1.4(2) . . . . ? 
F3 C3 C4 F4 0.0(2) . . . . ? 
C5 C3 C4 F4 178.24(12) . . . . ? 
F3 C3 C4 C9 -177.33(13) . . . . ? 
C5 C3 C4 C9 0.9(2) . . . . ? 
C10 C9 C4 F4 0.2(2) . . . . ? 
C1 C9 C4 F4 -178.96(12) . . . . ? 
C10 C9 C4 C3 177.51(14) . . . . ? 
C1 C9 C4 C3 -1.7(2) . . . . ? 
C19 N1 C22 C23 51.04(16) . . . . ? 
C16 N1 C22 C23 170.83(12) . . . . ? 
C13 N1 C22 C23 -68.26(15) . . . . ? 
C19 N1 C16 C17 -176.75(12) . . . . ? 
C22 N1 C16 C17 61.74(16) . . . . ? 
C13 N1 C16 C17 -57.41(16) . . . . ? 
C4 C9 C10 C11 -174.70(14) . . . . ? 
C1 C9 C10 C11 4.4(2) . . . . ? 
C4 C9 C10 C12 10.3(2) . . . . ? 
C1 C9 C10 C12 -170.63(14) . . . . ? 
N4 C11 C10 C9 157(4) . . . . ? 
N4 C11 C10 C12 -27(4) . . . . ? 
N5 C12 C10 C9 159(3) . . . . ? 
N5 C12 C10 C11 -16(3) . . . . ? 
C19 N1 C13 C14 56.56(16) . . . . ? 
C22 N1 C13 C14 177.46(13) . . . . ? 
C16 N1 C13 C14 -62.62(16) . . . . ? 
C2 C5 C6 C7 -1.1(2) . . . . ? 
C3 C5 C6 C7 177.91(13) . . . . ? 
C2 C5 C6 C8 170.61(14) . . . . ? 
C3 C5 C6 C8 -10.4(2) . . . . ? 
N2 C7 C6 C5 169(2) . . . . ? 
N2 C7 C6 C8 -4(2) . . . . ? 
N3 C8 C6 C5 -169(2) . . . . ? 
N3 C8 C6 C7 3(2) . . . . ? 
C22 N1 C19 C20 51.54(16) . . . . ? 
C16 N1 C19 C20 -68.80(16) . . . . ? 
C13 N1 C19 C20 170.46(12) . . . . ? 
N1 C16 C17 C18 176.59(12) . . . . ? 
N1 C19 C20 C21 -175.89(13) . . . . ? 
N1 C13 C14 C15 167.51(13) . . . . ? 
N1 C22 C23 C24 179.57(13) . . . . ? 
 
_diffrn_measured_fraction_theta_max    0.992 
_diffrn_reflns_theta_full              25.00
_diffrn_measured_fraction_theta_full   0.992 
_refine_diff_density_max    0.287 
_refine_diff_density_min   -0.277 
_refine_diff_density_rms    0.054 
